# Supplementary material for: Functional characterization of a KCNAB3 genetic epilepsy with febrile seizures plus adult mouse model
Source: PubMed Central journal article supplement — Transl Pediatr. 2022 Oct;11(10):1615–23. doi: 10.21037/tp-22-436 (PMC9636457; doi:10.21037/tp-22-436), 2022-10
Supplement: tp-11-10-1615-dss.pdf [file tp-11-10-1615-dss.pdf]

## Data Sharing Statement

|                     |                                                                                                                                                     |                                                                                                                                 |
|---------------------|-----------------------------------------------------------------------------------------------------------------------------------------------------|---------------------------------------------------------------------------------------------------------------------------------|
| <b>Article Info</b> | <a href="https://dx.doi.org/10.21037/tp-22-436">https://dx.doi.org/10.21037/tp-22-436</a>                                                           |                                                                                                                                 |
| <b>Item</b>         | <b>Question</b>                                                                                                                                     | <b>Authors' Response<br/>(place "-" if not applicable)</b>                                                                      |
| 1                   | Would you like to share data collected for your study to others?                                                                                    | Yes.                                                                                                                            |
| 2                   | If not, would you like to share the reason for your decision?                                                                                       | -                                                                                                                               |
| 3                   | What data in particular will be shared?                                                                                                             | Patch-clamp detection data.                                                                                                     |
| 4                   | Any other documents will be shared? Such as study protocol, statistical analysis plan, informed consent form, clinical study report, analytic code. | Statistical analysis plan, and clinical study report will also be shared if requested.                                          |
| 5                   | When will data availability begin?                                                                                                                  | From the publication date.                                                                                                      |
| 6                   | When will data availability end?                                                                                                                    | Two years within the publication date, since the technique may be updated over time.                                            |
| 7                   | To whom will you share the data?                                                                                                                    | Doctors who are interested in this study.                                                                                       |
| 8                   | For what type of analysis or purpose?                                                                                                               | To analyze the pathogenic causes of GEFS+.                                                                                      |
| 9                   | How or where can the data/documents be obtained?                                                                                                    | Emails could be sent to the address below to obtain the shared data: <a href="mailto:1146620602@qq.com">1146620602@qq.com</a> . |
| 10                  | Any other restrictions?                                                                                                                             | We may balance the potential benefits and risks for each request and then provide the data that could be shared.                |
